# Supplementary material for: Protocol for a prospective cohort study exploring the gut microbiota of infants with congenital heart disease undergoing cardiopulmonary bypass (the GuMiBear study)
Source: HighWire-hosted journal article supplement (doi:10.1136/bmjopen-2022-067016), 2023-03-01
Supplement: bmjopen-2022-067016supp002_data_supplement.pdf [file bmjopen-2022-067016supp002_data_supplement.pdf]

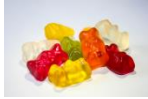

## The Gut Microbiota of Infants with Complex Congenital Heart Disease Undergoing Cardiopulmonary Bypass

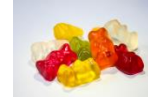

( GuMiBear)

### STANDARD OPERATING PROCEDURE FOR STOOL SAMPLE COLLECTION AS AN OUTPATIENT

**Purpose:** To collect infant stool samples while the infant is an out-patient from CHI at Crumlin

**Objective:** To collect infant stool samples for the study in a uniform manner and under a set of conditions, so that they can be processed by the laboratories to achieve optimal results.

**Procedure:**

1. Ensure that at least one legal guardian has provided written informed consent for their infant to participate in the study and that they are happy for their infant to remain in the study.
2. Ensure that in the hospital chart of the infant that it is noted that he/she is participating in the study and contact details of the study team.
3. Ensure the parent/guardian has been supplied with a study pack containing the requisites for the collection of the stool sample
  - a. Completed labels
  - b. Disposable Gloves
  - c. Stool collection containers
  - d. Bio-hazard bags
4. Explain to the legal guardian that a minimum of a teaspoon of stool has to be collected. Explain to the legal guardian when the samples have to be collected as close as possible to the next out-patient appointment.
5. Explain to parent/guardian how to collect the sample as follows:
  - a. Have requisites for collection at the ready.(Gloves, sample container, red biohazard bag & labels)
  - b. Place appropriate label on the sample bottle.
  - c. Wear disposable gloves
  - d. Unscrew cap of sample bottle

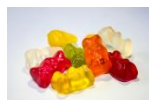

### The Gut Microbiota of Infants with Complex Congenital Heart Disease Undergoing Cardiopulmonary Bypass

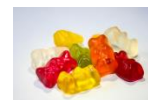

( GuMiBear)

- e. Spoon in stool sample (1 teaspoon in volume)
  - f. Screw cap on tightly
  - g. Place in red hazard bag
  - h. Remove disposable gloves
  - i. Dispose with soiled nappy
  - j. Wash hands
  - k. Place stool sample in fridge
  - l. Text research nurse that sample is ready for collection.
6. Label the sample bottles with Subject Number, Date of Birth, Initials, Sample Number, Date of Collection
  7. Ask the parent/guardian to attach the appropriate label to the sample container and immediately place container in freezer.
  8. Text the parent/guardian the night before the sample is to be collected. Meet the parent/guardian in out-patients to collect the stool sample and store the sample in the study container in the designated study freezer.
  9. Update the study spreadsheet to indicate sample has been obtained.
